# Supplementary material for: Efficient Synthesis of Pyrrole Disulfides Catalyzed by Lipase in Ethanol
Source: MDPI journal article supplement (doi:10.3390/catal13121493), 2023-12-06
Supplement: s1 [file s1]

*Supporting information for*

# Efficient Synthesis of Pyrrole Disulfides Catalyzed by Lipase in Ethanol

Feiyang Wen <sup>1,†</sup>, Yuelin Xu <sup>1,†</sup>, Fengxi Li <sup>1</sup>, Jinglin Ma <sup>1</sup>, Zhi Wang <sup>1</sup>, Hong Zhang <sup>2,\*</sup> and Lei Wang <sup>1,\*</sup>

<sup>1</sup> Key Laboratory of Molecular Enzymology and Engineering of Ministry of Education, School of Life Sciences, Jilin University, Changchun 130023, China

<sup>2</sup> Institute for Interdisciplinary Biomass Functional Materials Studies, Jilin Engineering Normal University, Changchun 130052, China

\* Correspondence: zhanghong0825@jlenu.edu.cn (H.Z.); w\_lei@jlu.edu.cn (L.W.)

<sup>†</sup> These authors contributed equally to this work.

## Data of Products

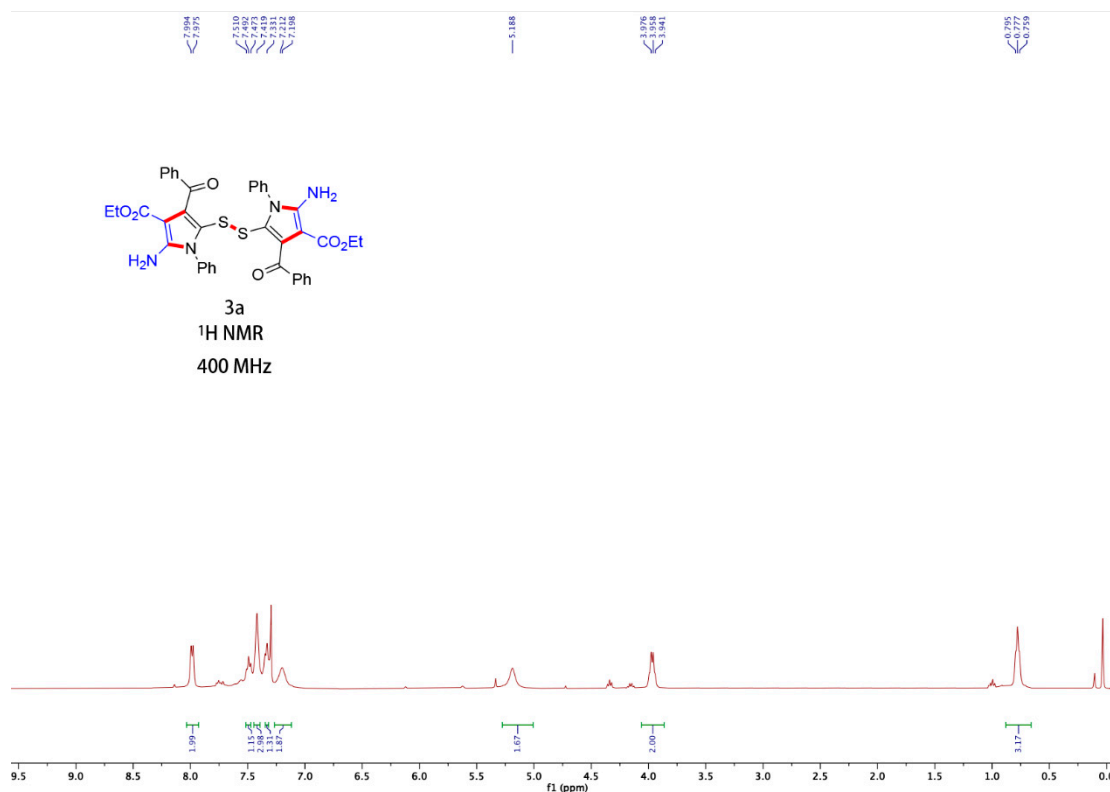

Figure S1.  $^1\text{H}$  NMR of **3a**.

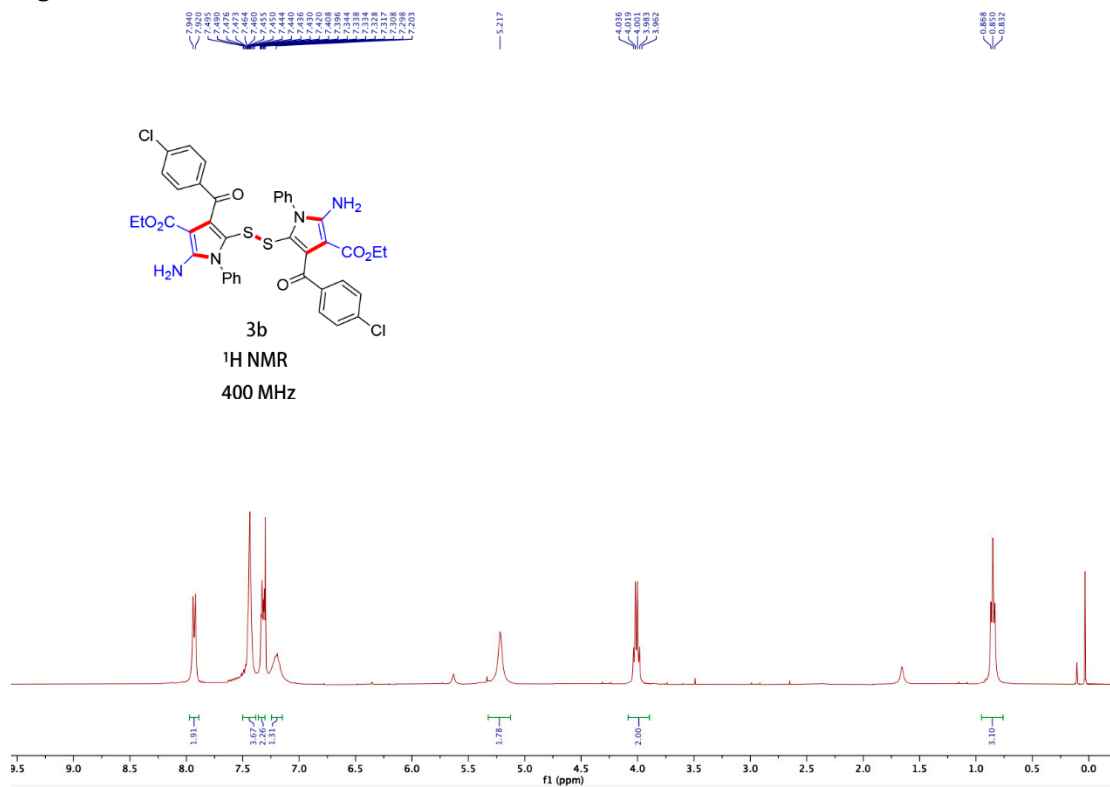

Figure S2.  $^1\text{H}$  NMR of **3b**.

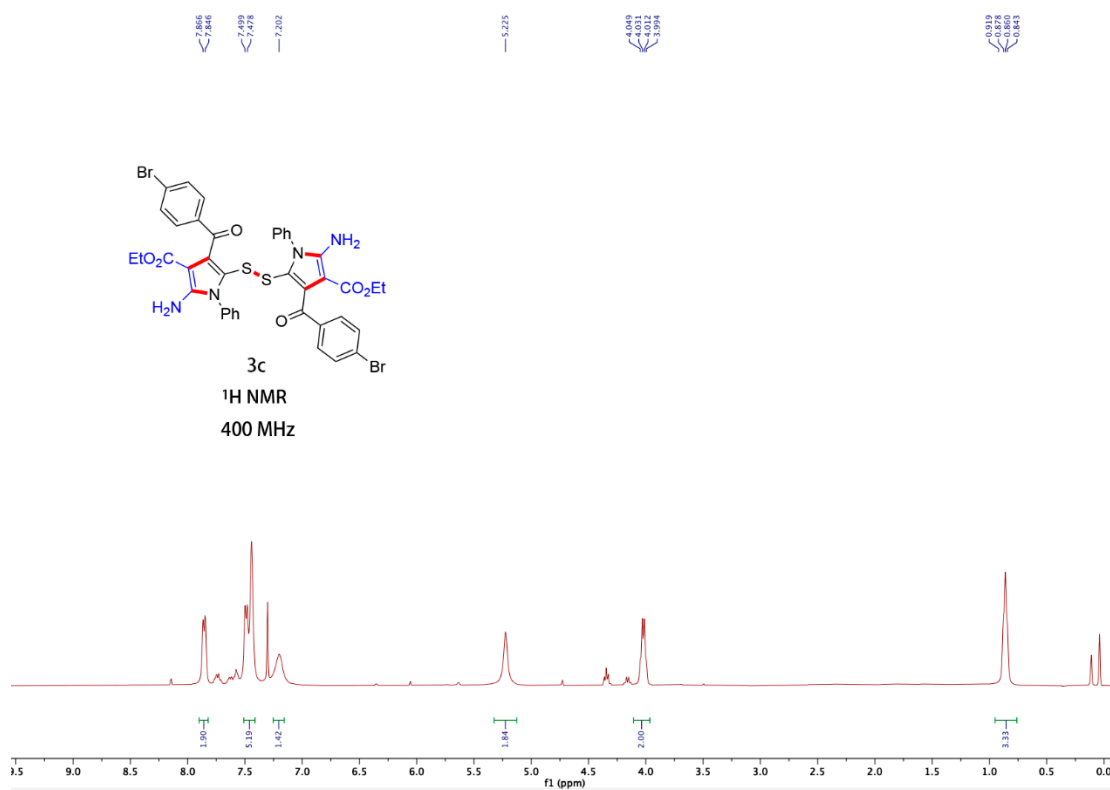

**Figure S3.**  $^1\text{H}$  NMR of **3c**.

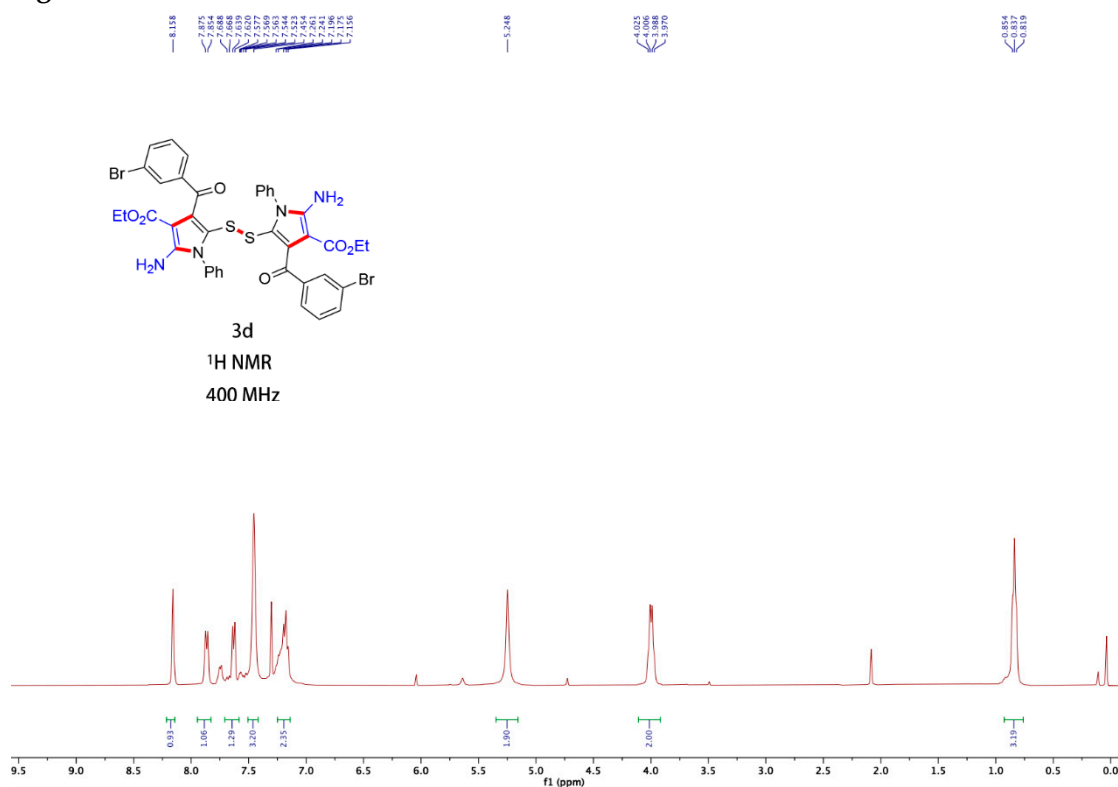

**Figure S4.**  $^1\text{H}$  NMR of **3d**.

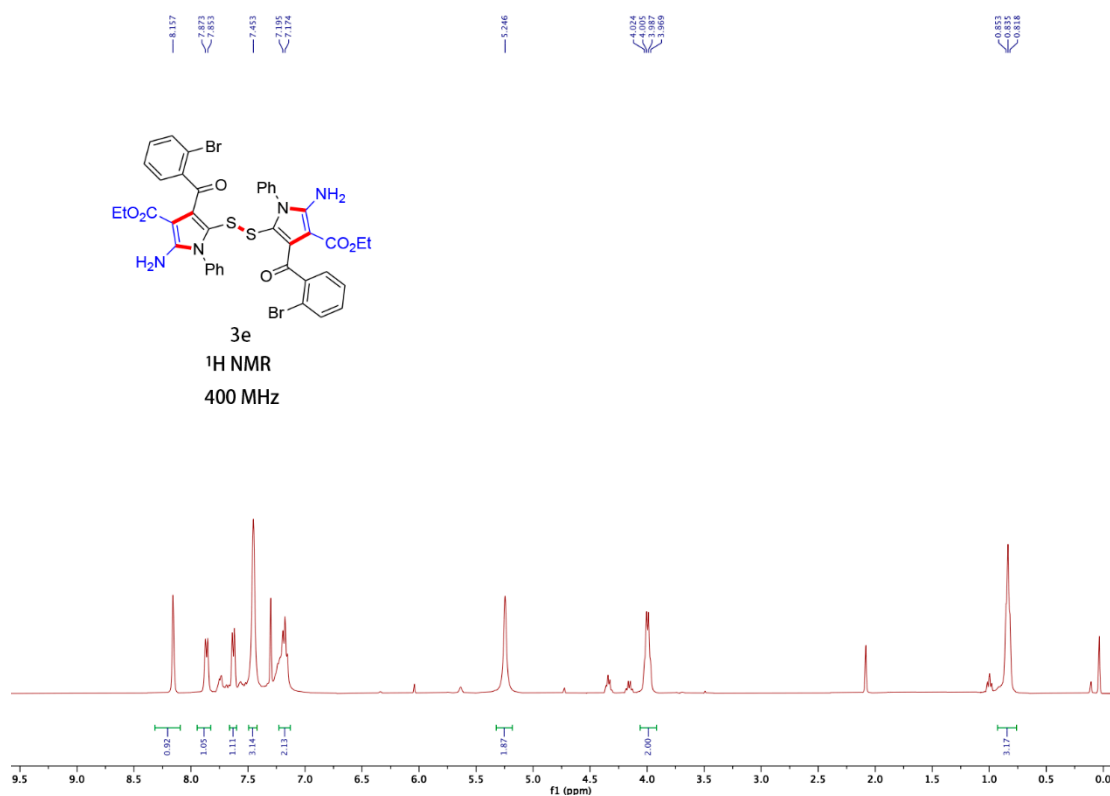

Figure S5.  $^1\text{H}$  NMR of **3e**.

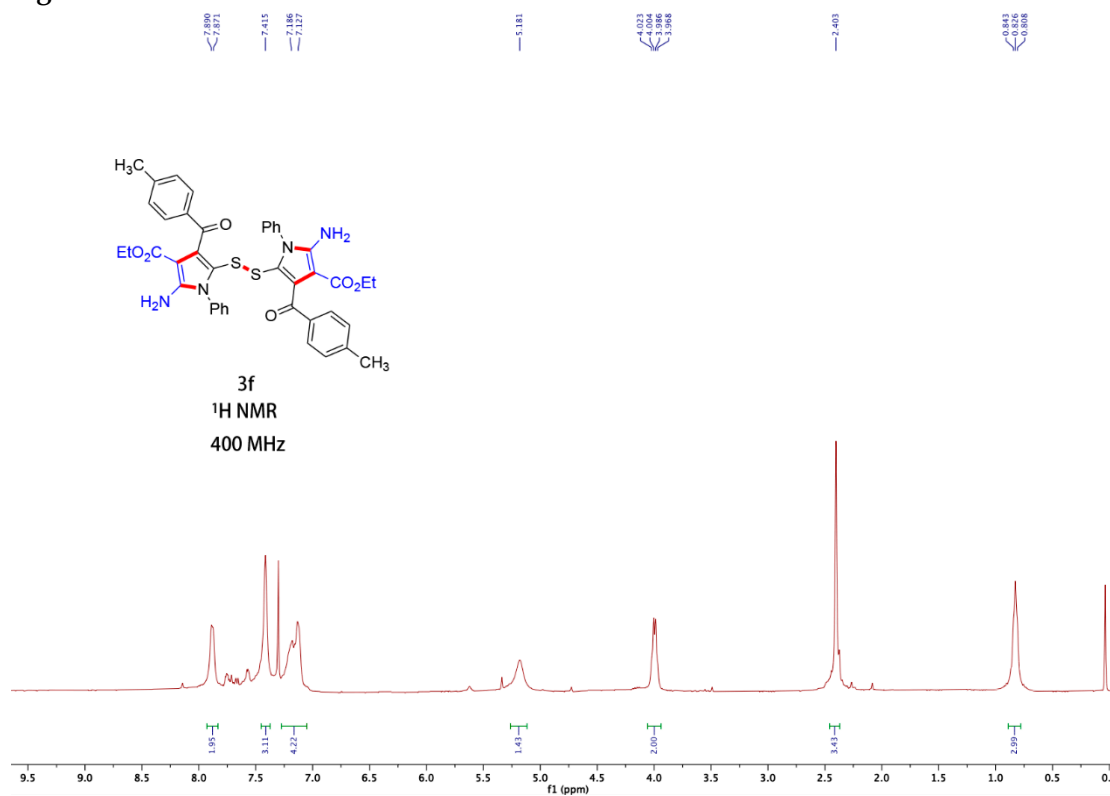

Figure S6.  $^1\text{H}$  NMR of **3f**.

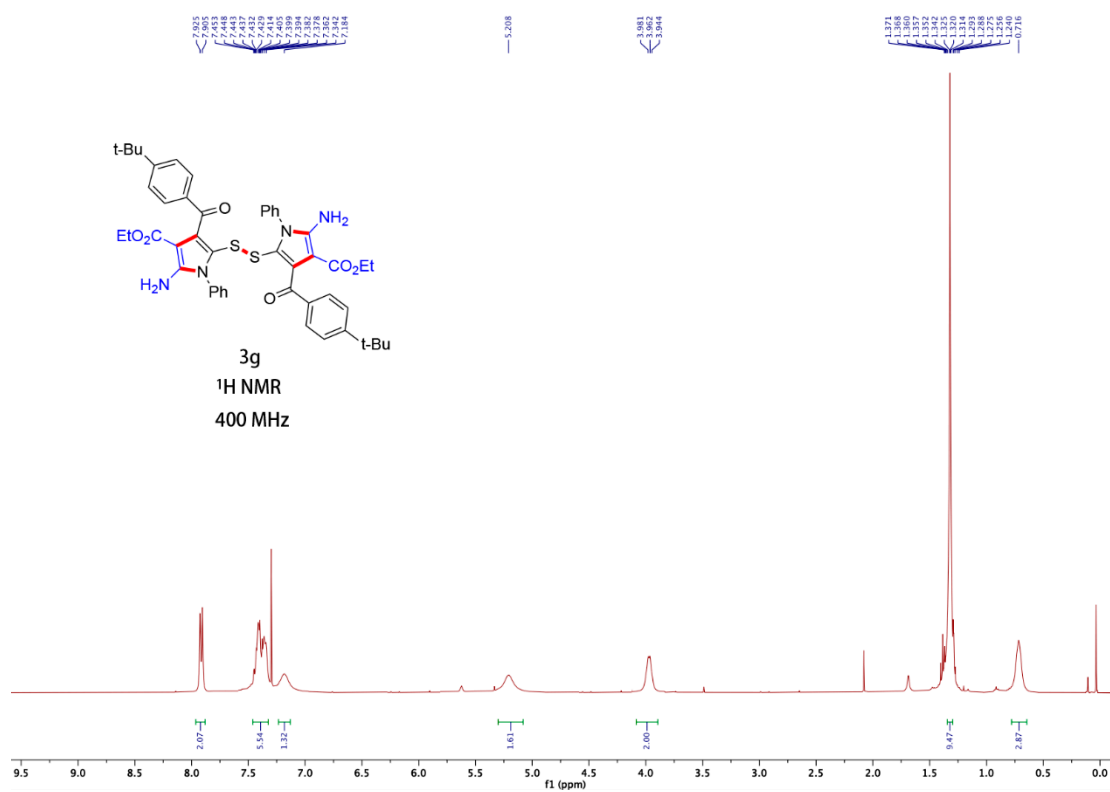

Figure S7.  $^1\text{H}$  NMR of **3g**.

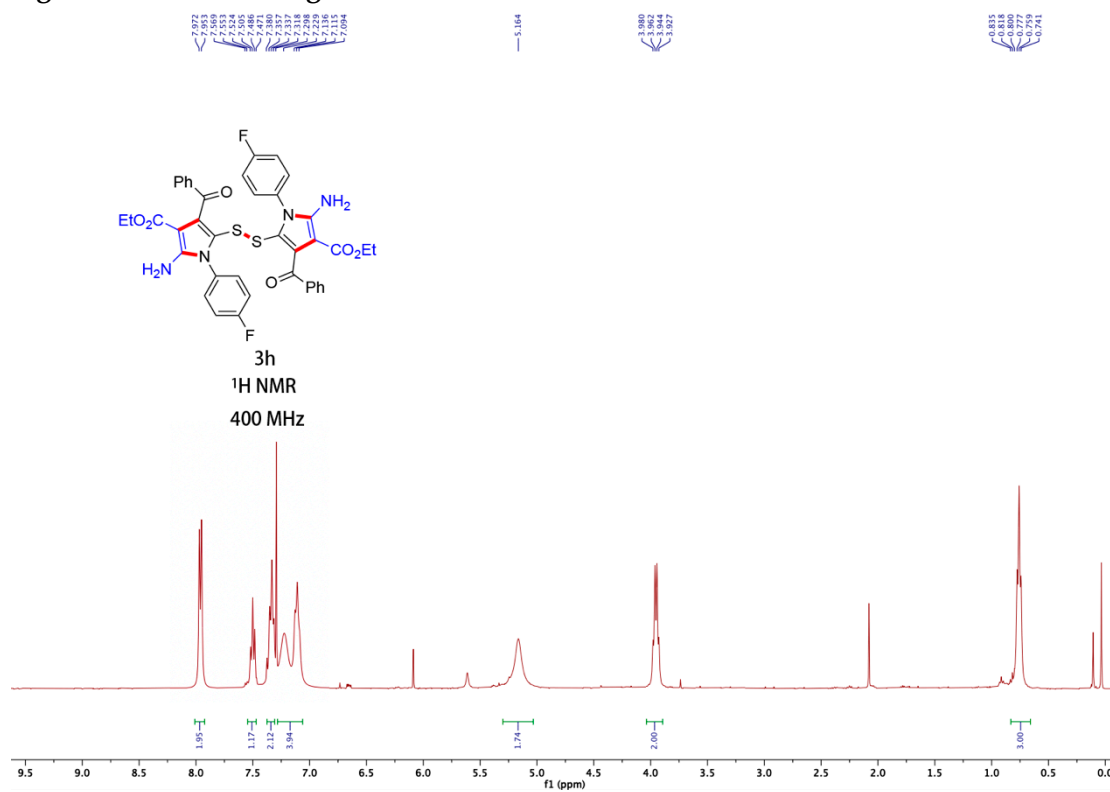

Figure S8.  $^1\text{H}$  NMR of **3h**.

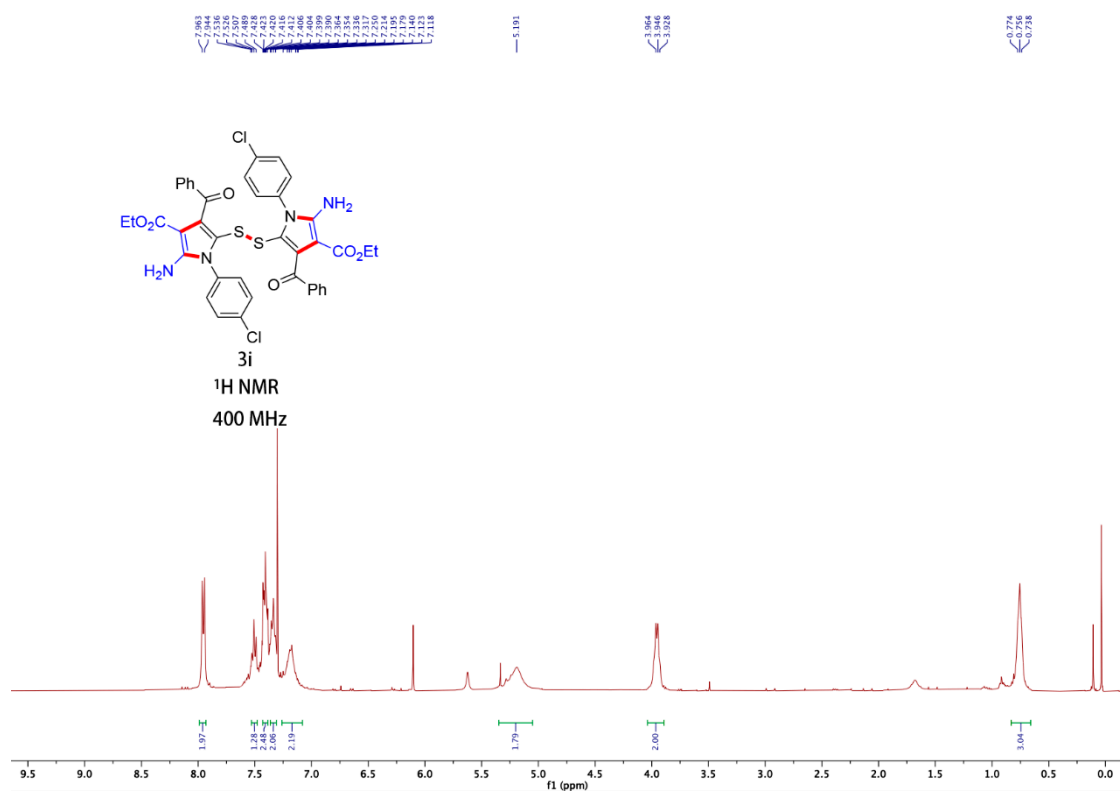

Figure S9.  $^1\text{H}$  NMR of **3i**.

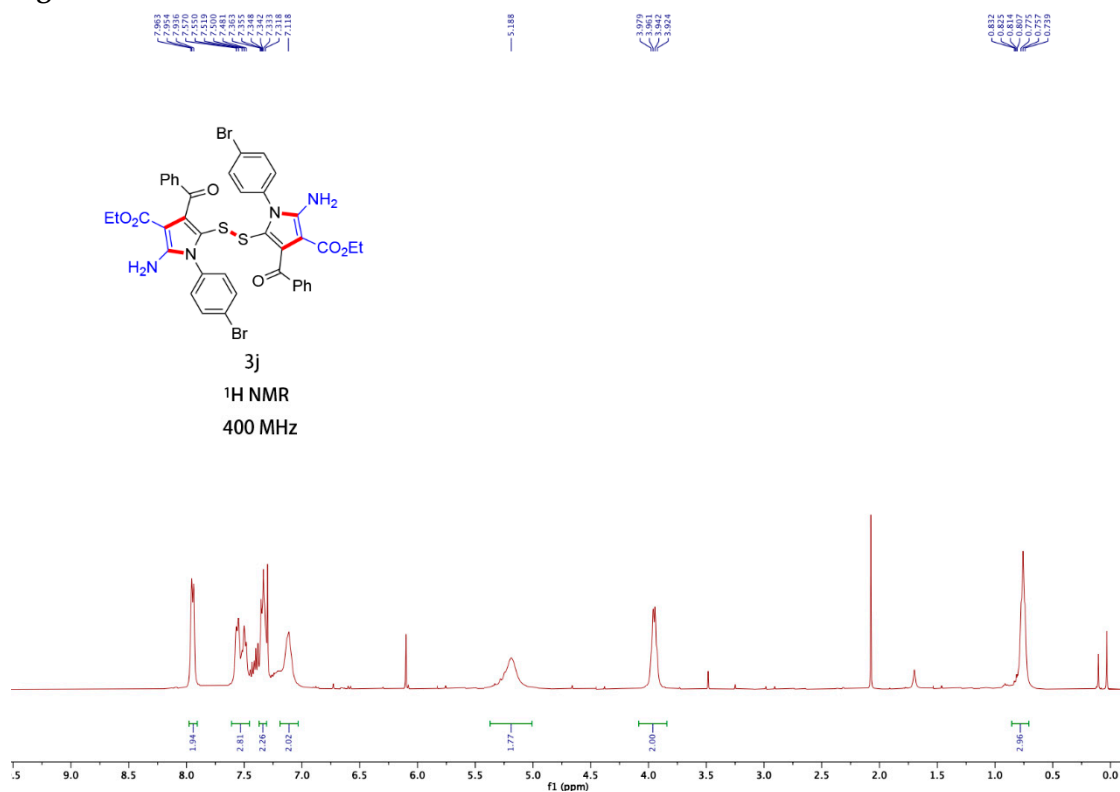

Figure S10.  $^1\text{H}$  NMR of **3j**.

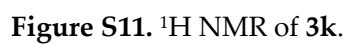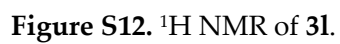

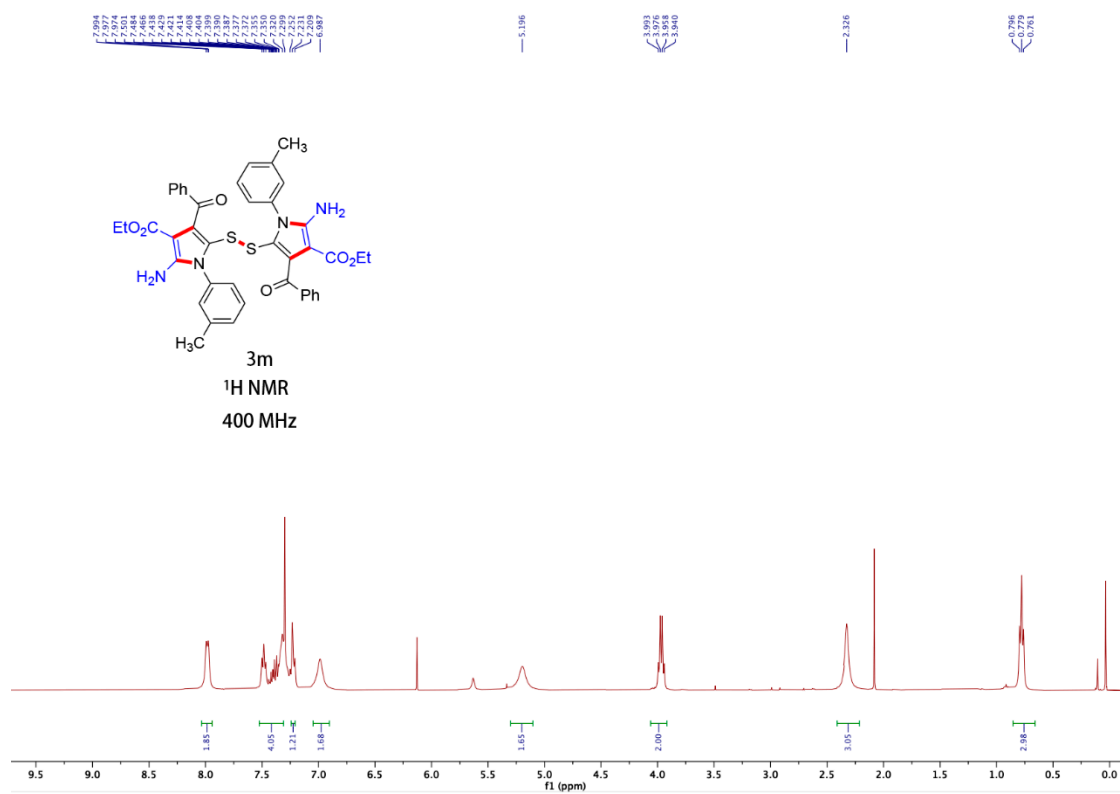

Figure S13.  $^1\text{H}$  NMR of **3m**.

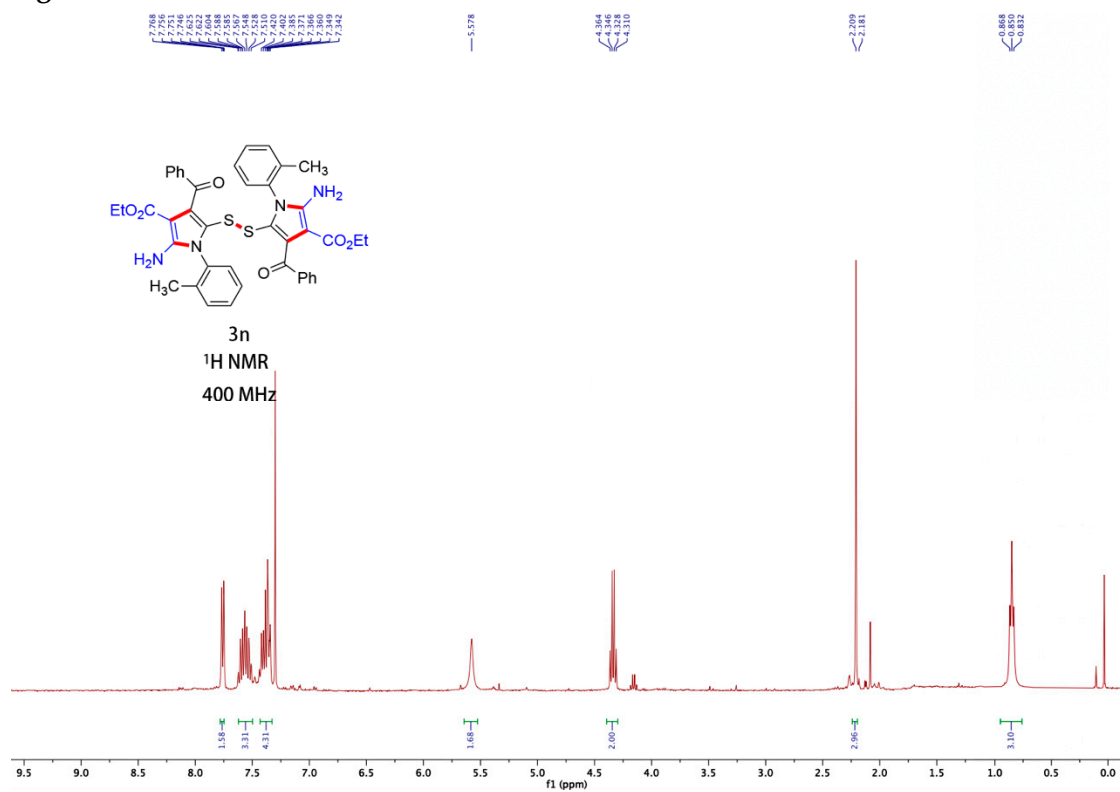

Figure S14.  $^1\text{H}$  NMR of **3n**.



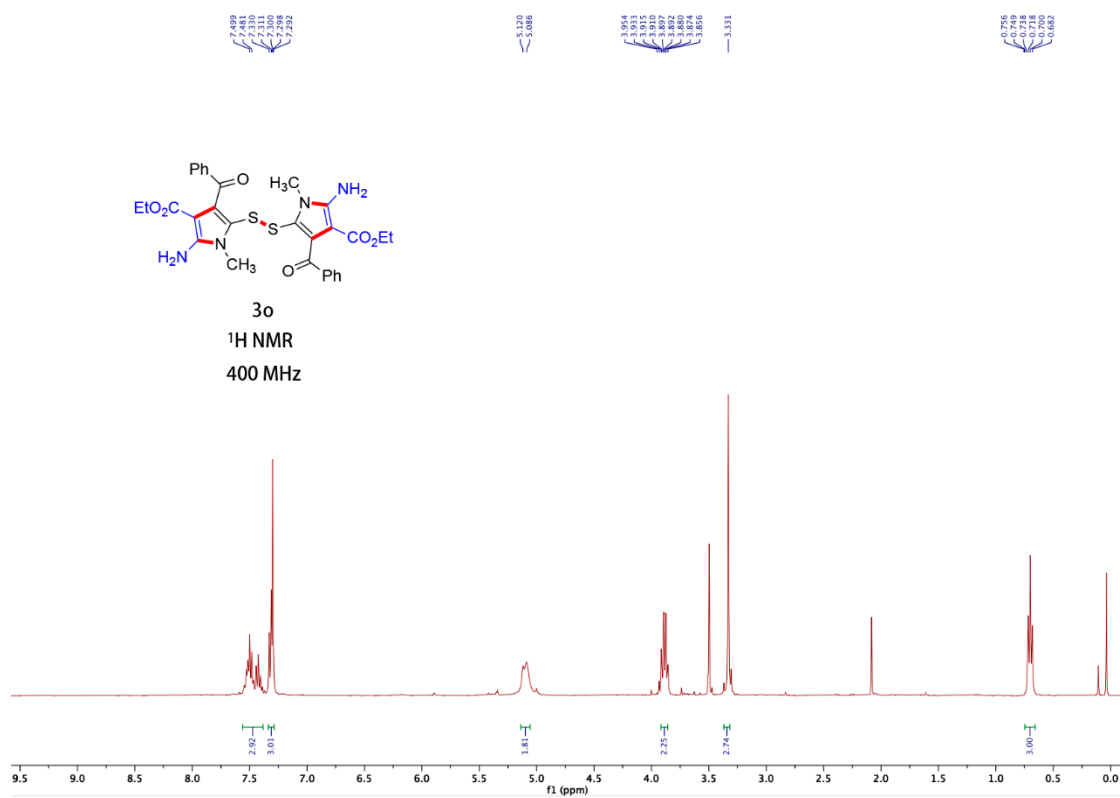

Figure S15.  $^1\text{H}$  NMR of **3o**.

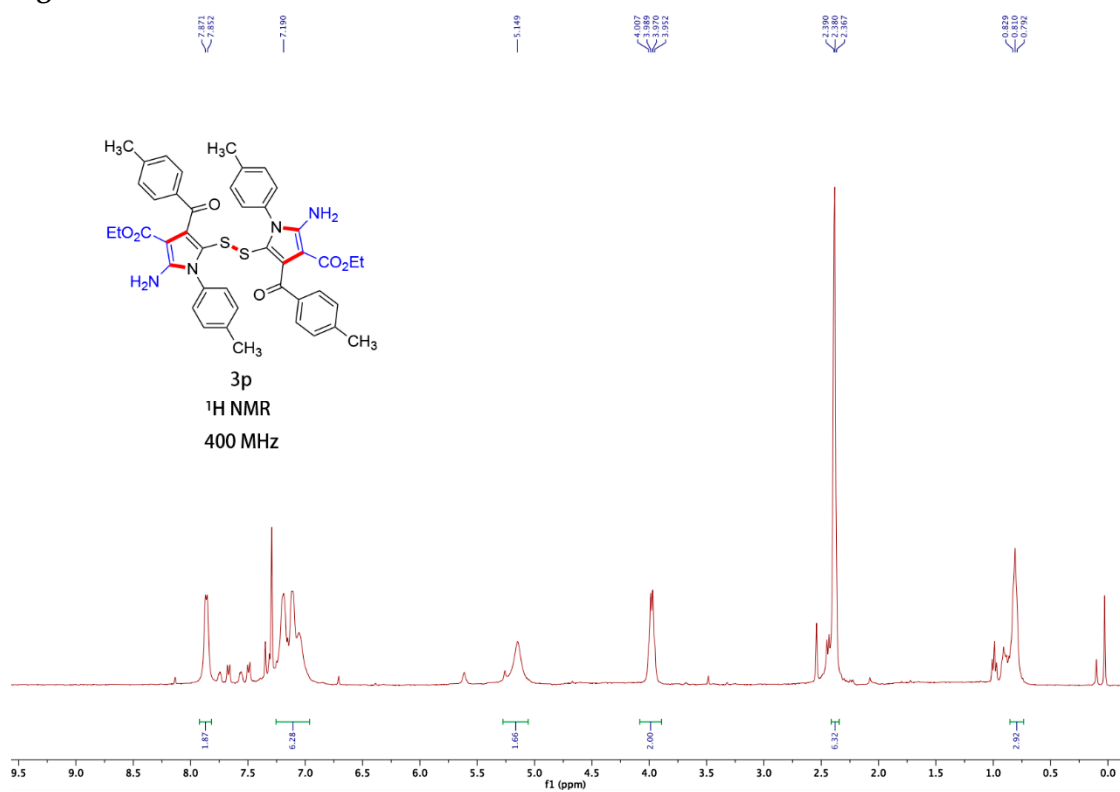

Figure S16.  $^1\text{H}$  NMR of **3p**.

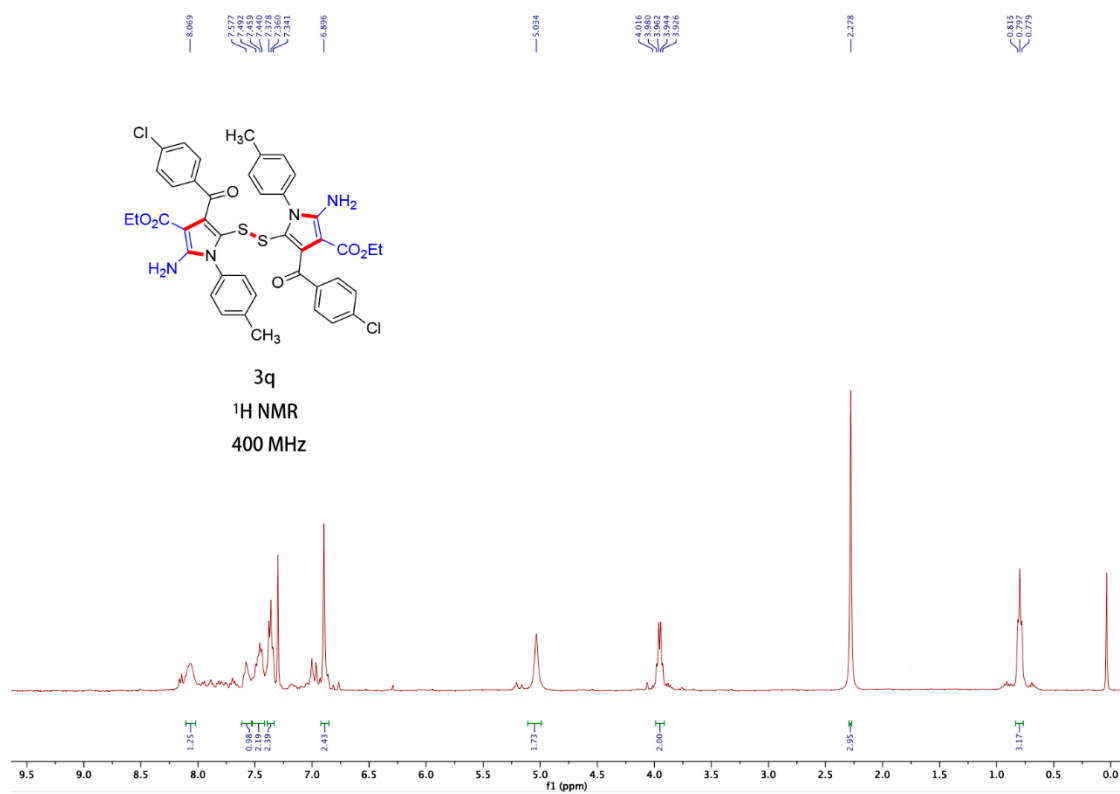

Figure S17.  $^1\text{H}$  NMR of **3q**.

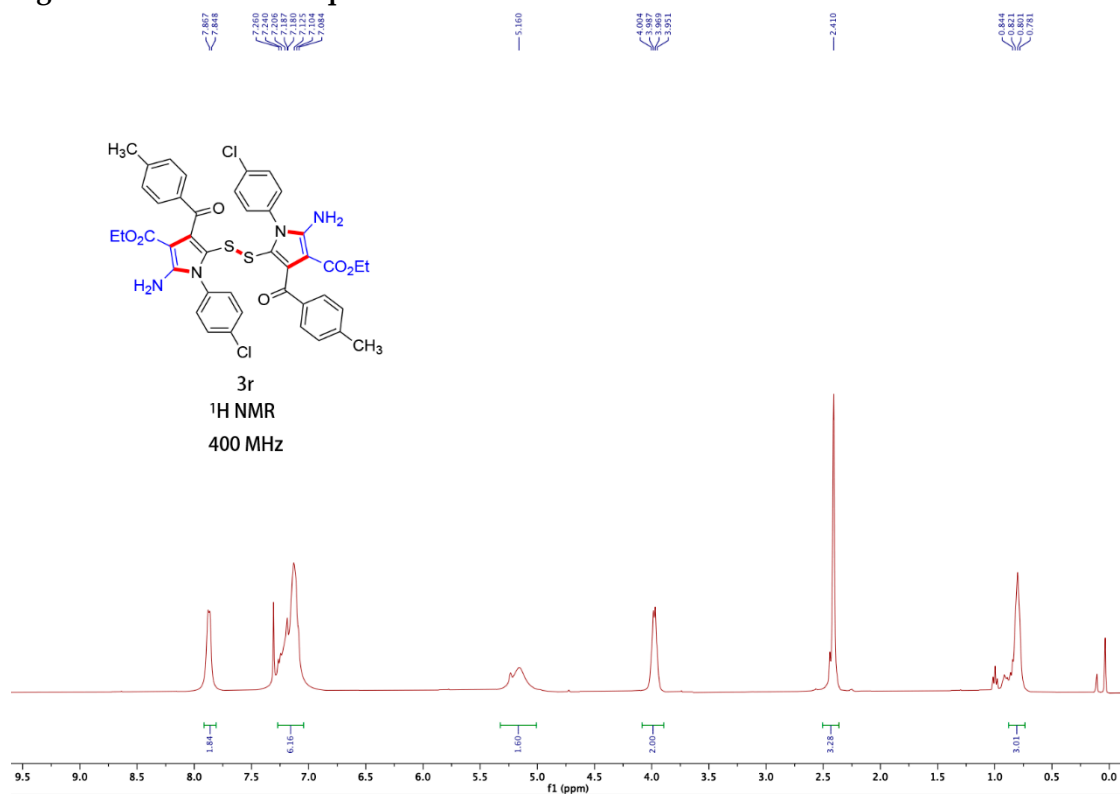

Figure S18.  $^1\text{H}$  NMR of **3r**.

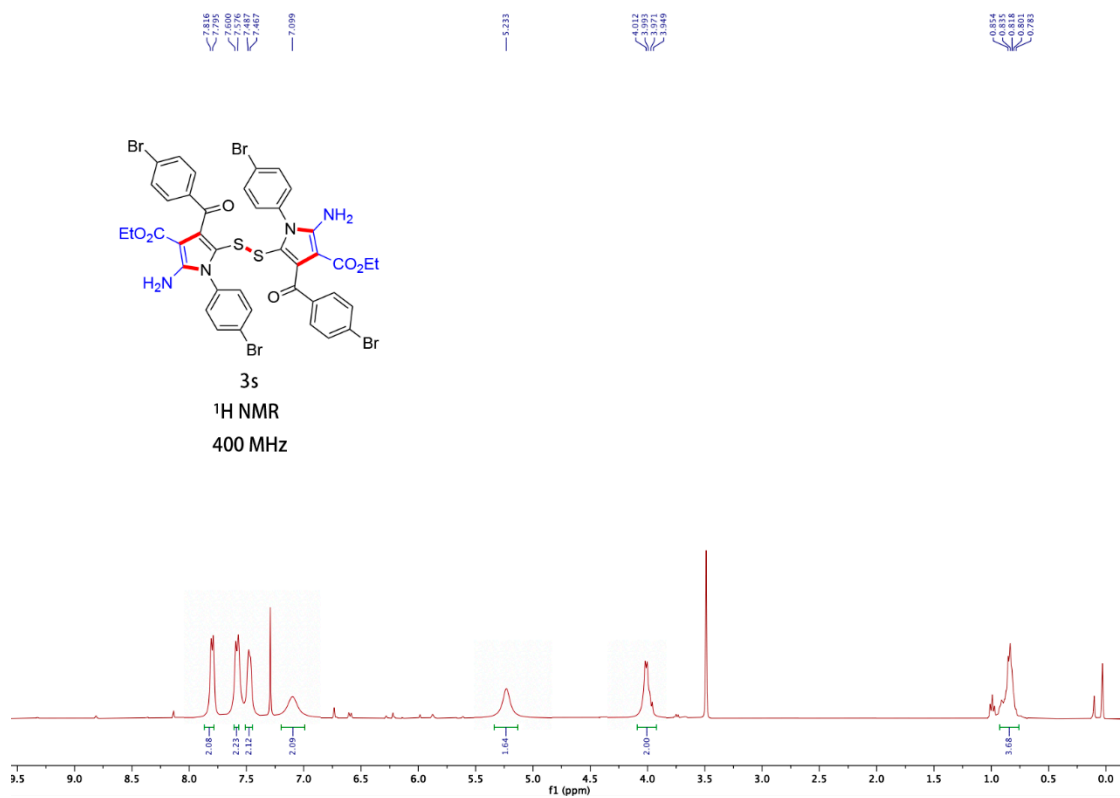

Figure S19.  $^1\text{H}$  NMR of **3s**.

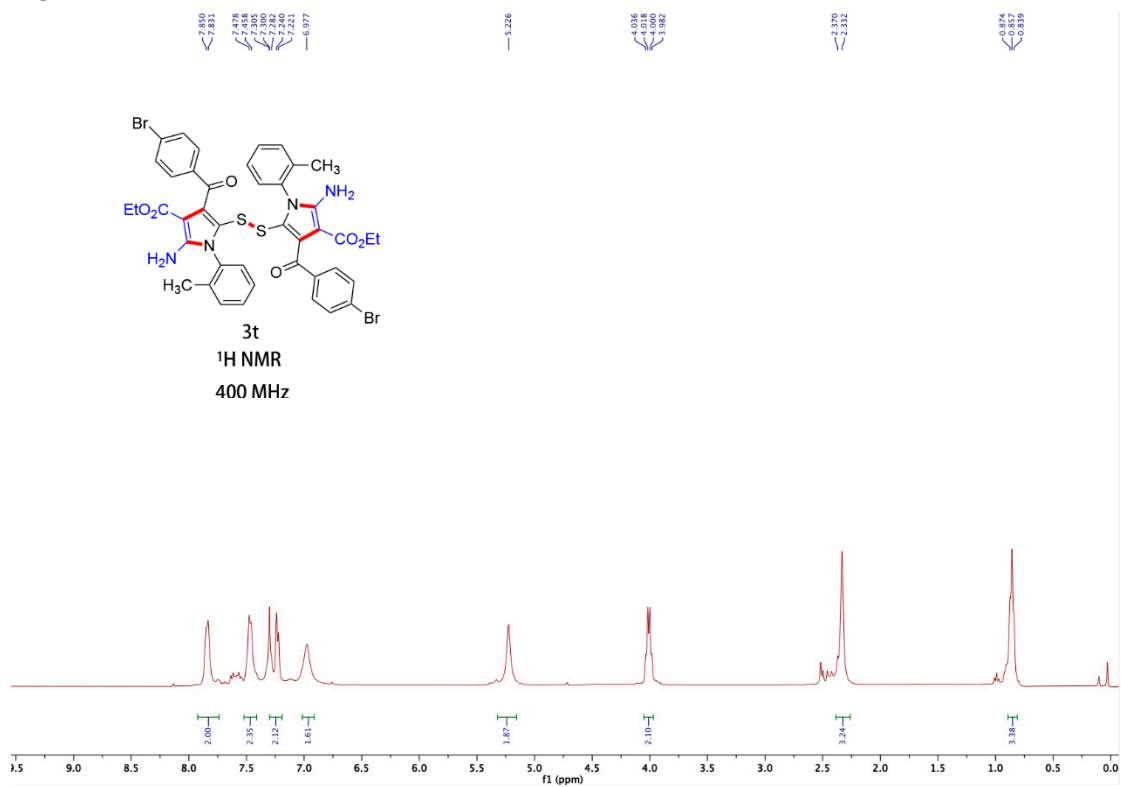

Figure S20.  $^1\text{H}$  NMR of **3t**.
